# Supplementary material
Source: publisher site journal article supplement (https://www.spandidos-publications.com/3081/downloadSupplementary)
Supplement: Supplementary file 1 [file downloadSupplementary]

Table SI. Clinicopathological characteristics of studied patients and expression of miR-660 in LC.

| Characteristics  | Number of cases |
|------------------|-----------------|
| Sex              |                 |
| Male             | 5               |
| Female           | 3               |
| Age (years)      |                 |
| >45              | 5               |
| ≤45              | 3               |
| Clinical Stage   |                 |
| I                | 7               |
| II               | 0               |
| III              | 1               |
| IV               | 0               |
| T classification |                 |
| T1               | 7               |
| T2               | 0               |
| T3               | 0               |
| T4               | 1               |
| N classification |                 |
| N0               | 8               |
| N1               | 0               |
| M classification |                 |
| Yes              | 0               |
| No               | 8               |
| Cirrhosis        |                 |
| Yes              | 4               |
| No               | 4               |
| HBsAg            |                 |
| Yes              | 8               |
| No               | 0               |
| HCV              |                 |
| Yes              | 0               |
| No               | 8               |
